# Supplementary material
Source: PubMed Central journal article supplement (PMC6761683)
Supplement: ao9b01136_si_001.pdf [file ao9b01136_si_001.pdf]

# Characterization of glycosaminoglycans in gaping and intact connective tissue of farmed Atlantic salmon (*Salmo salar*) fillets by mass spectrometry

Ása Jacobsen<sup>1\*</sup>, Xiaofeng Shi<sup>2</sup>, Chun Shao<sup>2</sup>, Jonhard Eysturskarð<sup>1</sup>, Svein-Ole Mikalsen<sup>3</sup>,  
Joseph Zaia<sup>2</sup>

<sup>1</sup>Aquaculture Research Station of the Faroe Islands, vid Áir, FO-430 Hvalvík, The Faroe Islands

<sup>2</sup>Department of Biochemistry, Center for Biomedical Mass Spectrometry, Boston University School of Medicine, 670 Albany Street, Boston, MA 02118, USA

<sup>3</sup>Department of Science and Technology, University of the Faroe Islands, Vestara Bryggja 15, Tórshavn, The Faroe Islands

\*Corresponding author

Email addresses:

ÁJ: [asa@fiskaaling.fo](mailto:asa@fiskaaling.fo)

XS: [stephen.shi@gmail.com](mailto:stephen.shi@gmail.com)

CS: [shaochunletdreamfly@gmail.com](mailto:shaochunletdreamfly@gmail.com)

JE: [jonhard@fiskaaling.fo](mailto:jonhard@fiskaaling.fo)

SOM: [sveinom@setur.fo](mailto:sveinom@setur.fo)

JZ: [jzaia@bu.edu](mailto:jzaia@bu.edu)

Table S1. Details of HS disaccharides measured.

| HS disaccharide | Ion species              | m/z   | Retention time (min) |
|-----------------|--------------------------|-------|----------------------|
| DOA0            | 1-                       | 378   | 108                  |
|                 | Dimer, 1-                | 757   | 108                  |
|                 | Adduct, 1-               | 468   | 108                  |
| D2A0/D0A2       | 1-                       | 458   | 98                   |
| D2A6            | 1-                       | 538   | 92                   |
|                 | 2-                       | 268.5 | 92                   |
| D0S0            | 1-                       | 416   | 103                  |
| D2S0/D0S6       | 1-                       | 496   | 96                   |
|                 | 2-                       | 247.5 | 96                   |
|                 | SO <sub>3</sub> loss, 1- | 416   | 96                   |
| D2S6            | 1-                       | 576   | 89                   |
|                 | 2-                       | 287.5 | 89                   |
|                 | SO <sub>3</sub> loss, 1- | 496   | 89                   |
|                 | SO <sub>3</sub> loss, 2- | 247.5 | 89                   |
| U0A0            | 1-                       | 396   | 108                  |
| U2A0/U0A6       | 1-                       | 476   | 98                   |
| U2A6            | 1-                       | 556   | 92                   |
|                 | 2-                       | 277.5 | 92                   |
| U0S0            | 1-                       | 434   | 103                  |
| U2S0/U0S6       | 1-                       | 514   | 96                   |
|                 | 2-                       | 256.5 | 96                   |
|                 | SO <sub>3</sub> loss, 1- | 434   | 96                   |
| U2S6            | 1-                       | 594   | 89                   |
|                 | 2-                       | 296.5 | 89                   |
|                 | SO <sub>3</sub> loss, 1- | 514   | 89                   |
|                 | SO <sub>3</sub> loss, 2- | 256.5 | 89                   |

Figure S1

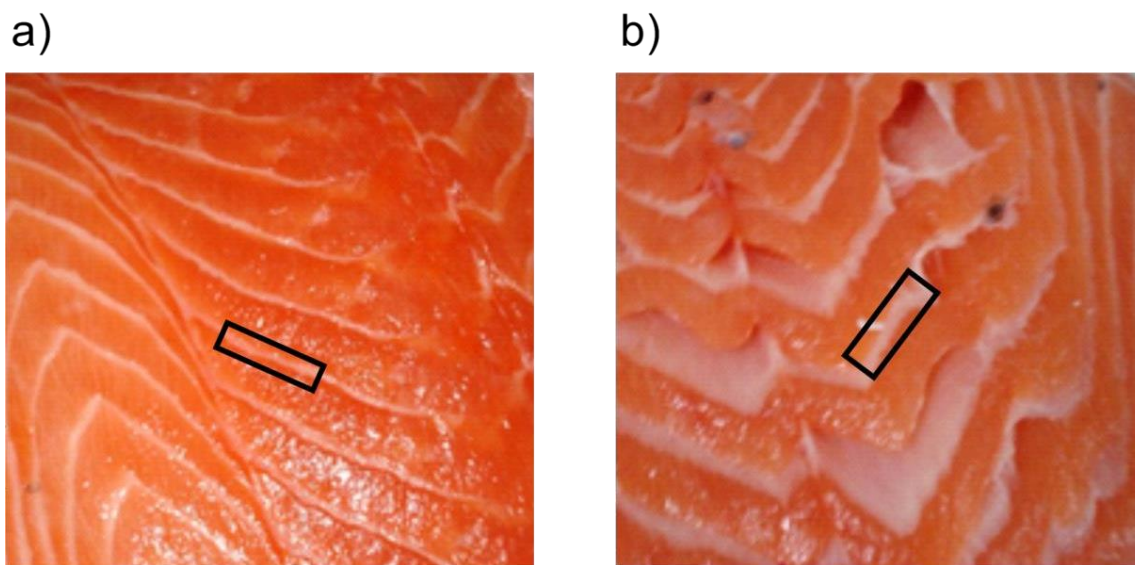

Figure S1. Photographs of (a) intact and (b) gaping salmon fillets. Samples used in this study were obtained by cutting out the connective tissue and adjoining muscle as illustrated by the areas outlined in black. Photograph courtesy of Durita Nielsen. Copyright 2019.

Figure S2

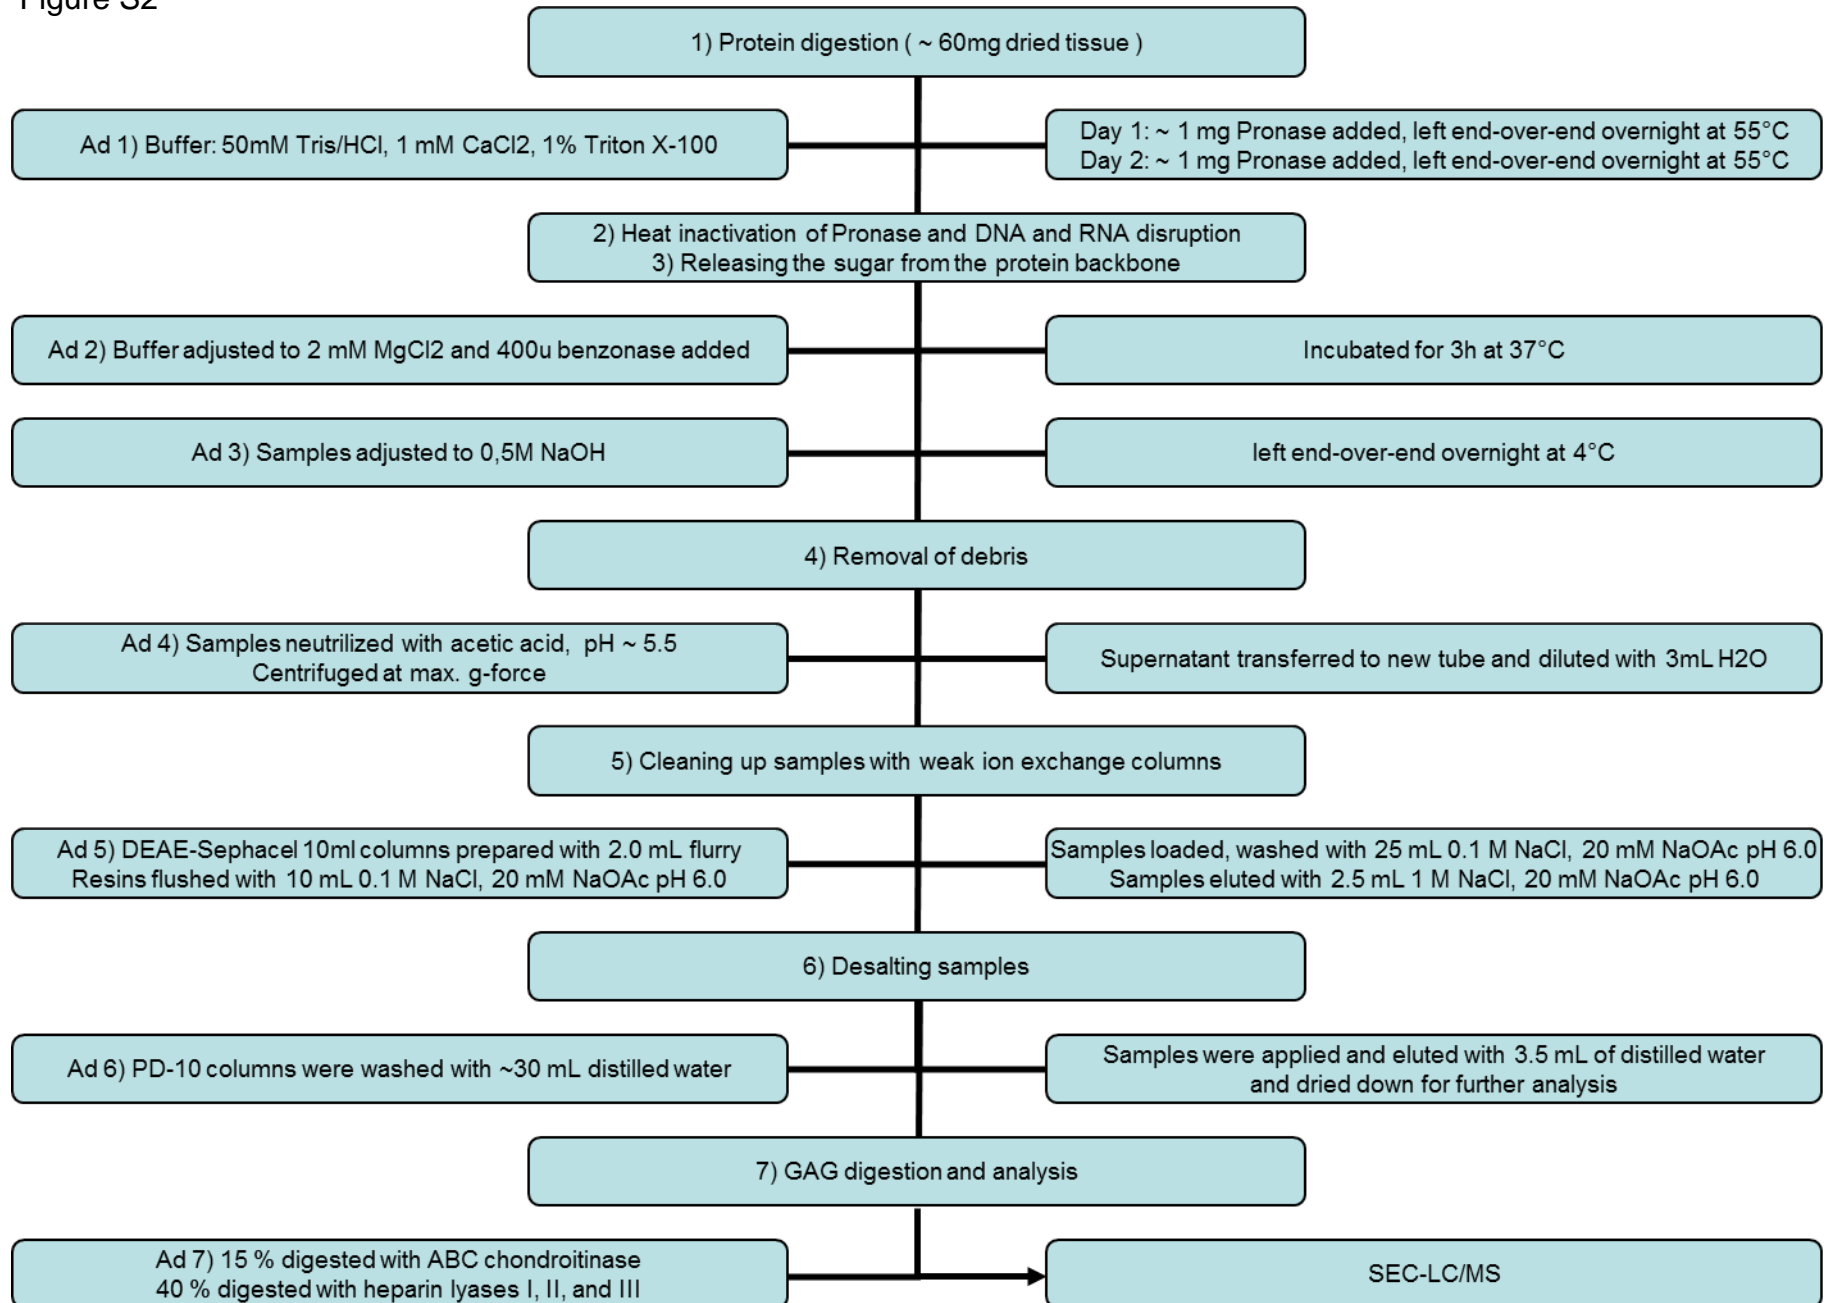

Figure S2. Outline of the GAG extraction and digestion procedures performed in the study
